# Supplementary material
Source: Springer Nature journal article supplement (https://www.springermedizin.de/resource/supplementary/13045_2010_140_MOESM15_ESM.pdf/9660844)

Fig. 8

*PIK3CA* wt/mu

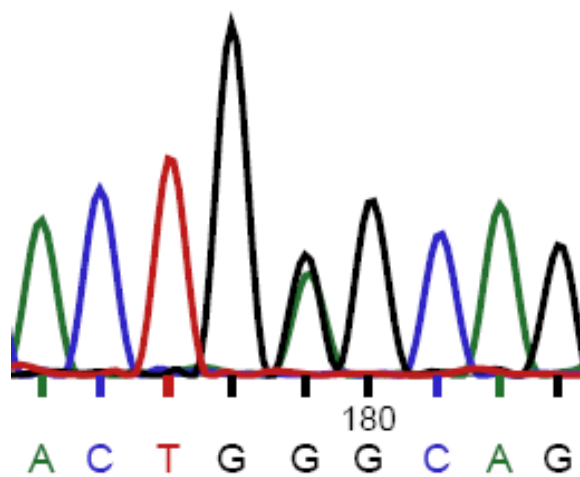

KCL-22

Supplement: MOESM15 [file 9660844]
